# Supplementary material for: What Are You Feeling? Using Functional Magnetic Resonance Imaging to Assess the Modulation of Sensory and Affective Responses during Empathy for Pain
Source: PLOS journal article supplement (doi:10.1371/journal.pone.0001292), 2007-12-11
Supplement: S4 (10.1371/journal.pone.0001292.s004) [file journal.pone.0001292.s004]

|  |  | IRI | | | | ECS | SPQ | |
| --- | --- | --- | --- | --- | --- | --- | --- | --- |
|  |  | PT | EC | PD | FS |  | P(A) | B |
| Sample  (N=18) | Mean  S.D. | 18.94  4.89 | 18.67  4.52 | 10.72  5.03 | 15.22  4.89 | 41.61  5.75 | 0.88  0.04 | 6.37  1.29 |

Legend: PT = perspective taking, EC = empathic concern, PD = personal distress, FS = fantasy scale. Maximum Scores: IRI subscales 28, Emotional Contagion Scale 60.
